# Supplementary material for: Guest inducing p-sulfonatocalix[4]arene into three-dimensional capsule architecture and a mixed A–B double layer framework
Source: Royal Society of Chemistry journal article supplement (doi:10.1039/b805628e), 2008-01-01
Supplement: b805628e.pdf [file b805628e.pdf]

## Supplementary Information

### Guest inducing *p*-sulfonatocalix[4]arene into three dimensional capsule architecture and mixed A-B double layer framework

Guoli Zheng,<sup>a</sup> Feng Zhang,<sup>b</sup> Yinyan Li,<sup>a</sup> Hongjie Zhang<sup>a\*</sup>

<sup>a</sup> *State Key Laboratory of Rare Earth Resource Utilization, Changchun Institute of Applied Chemistry, Chinese Academy of Sciences, Changchun 130022, P. R. China;*

*and Graduate School of the Chinese Academy of Sciences, Beijing, P. R. China*

<sup>b</sup> *Lanzhou Petrochemical Research Center Petrochina, Lanzhou 730060, P. R. China;*

\*Corresponding author. Fax: +86-431-85698041; Tel: +86-431-85262127.

*E-mail address:* [hongjie@ciac.jl.cn](mailto:hongjie@ciac.jl.cn) (H.-J. Zhang)

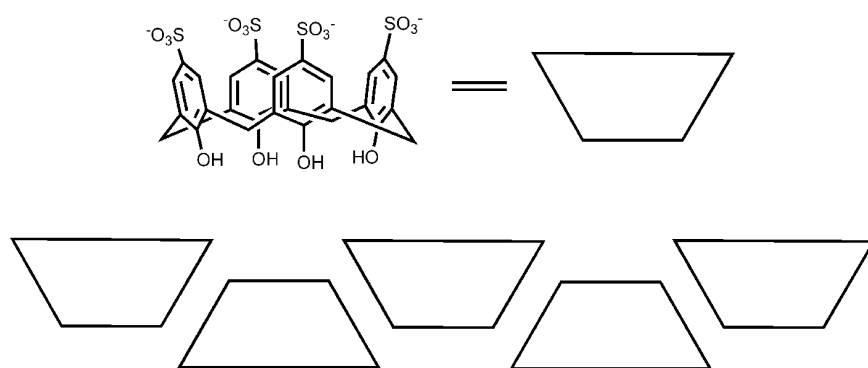

**Fig. S1** Schematic representation of the bi-layer structure of *p*-sulfonatocalix[4]arene.

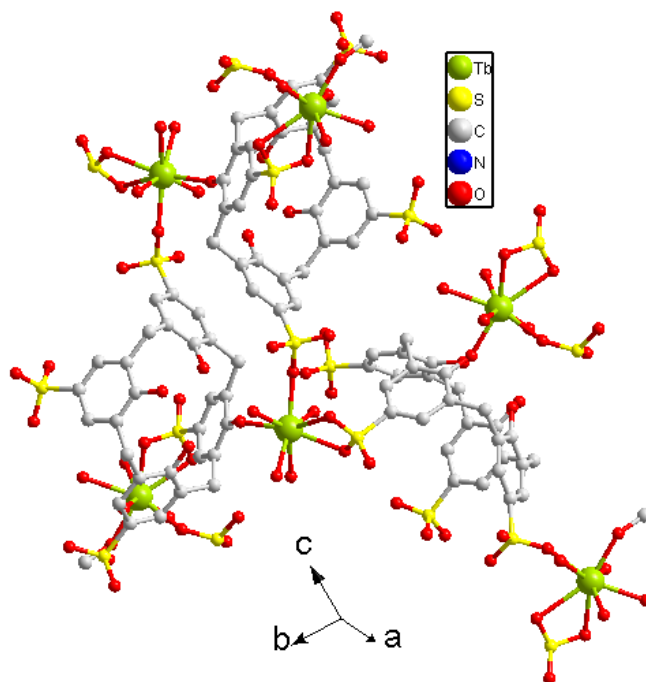

**Fig. S2** The coordination environment of  $\text{Tb}^{3+}$ .

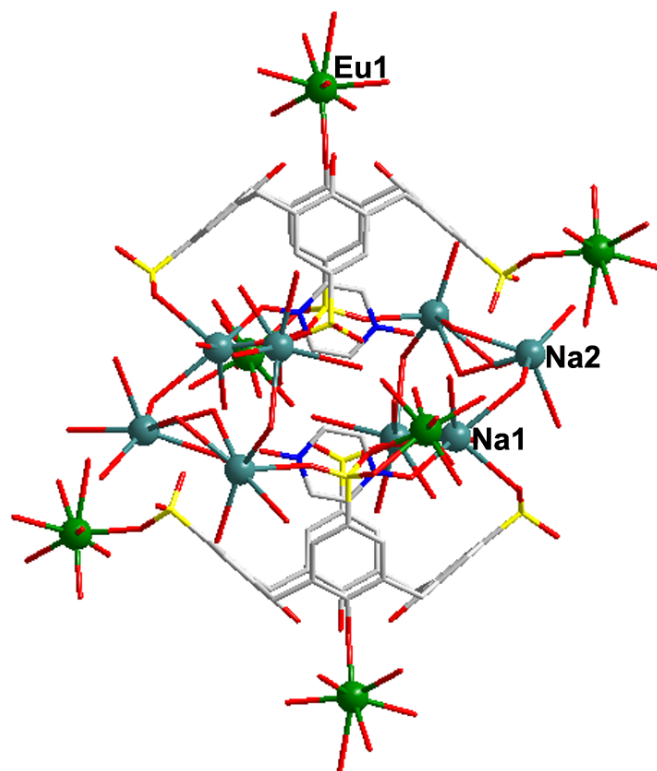

**Fig. S3** Capsule structure of compound 2

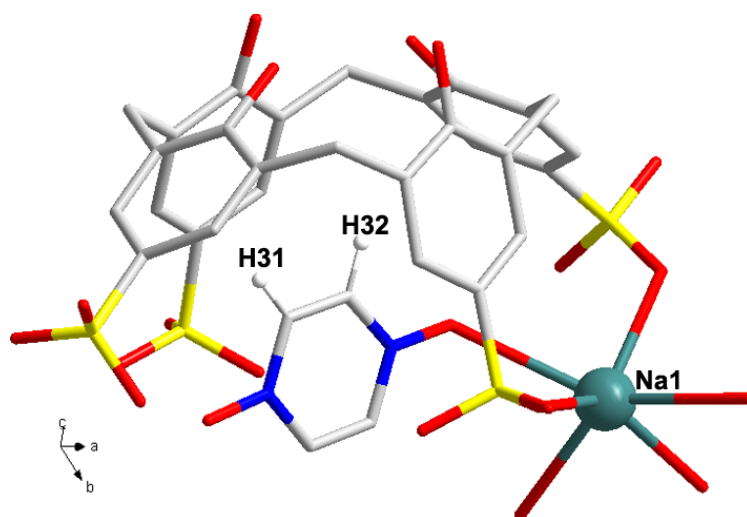

**Fig. S4** Host-guest interactions in compound 1 and 2.

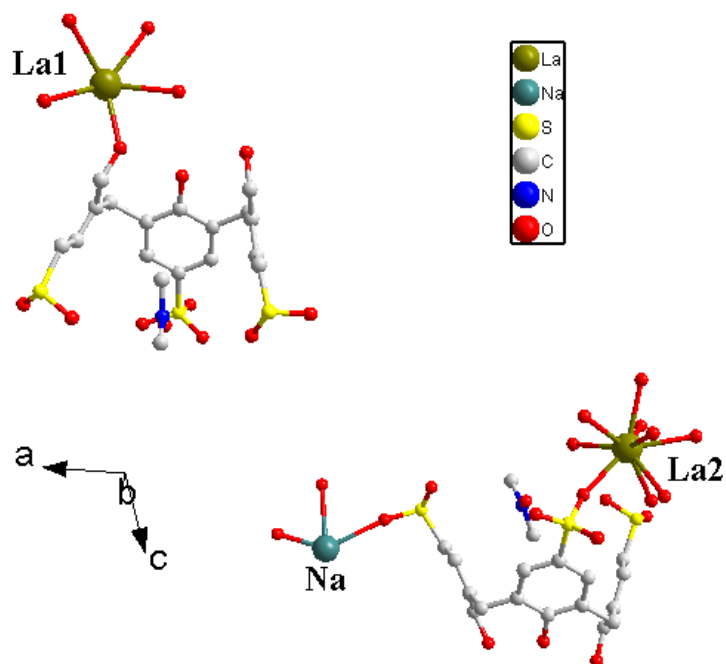

Fig. S5 The asymmetric unit of compound 3.

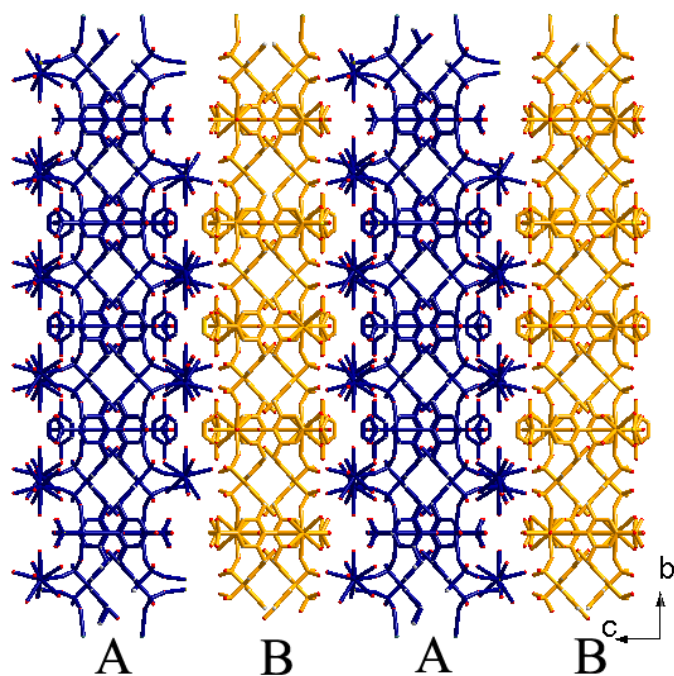

Fig. S6 Crystal packing structure of compound 3 (viewed down the *a* direction).

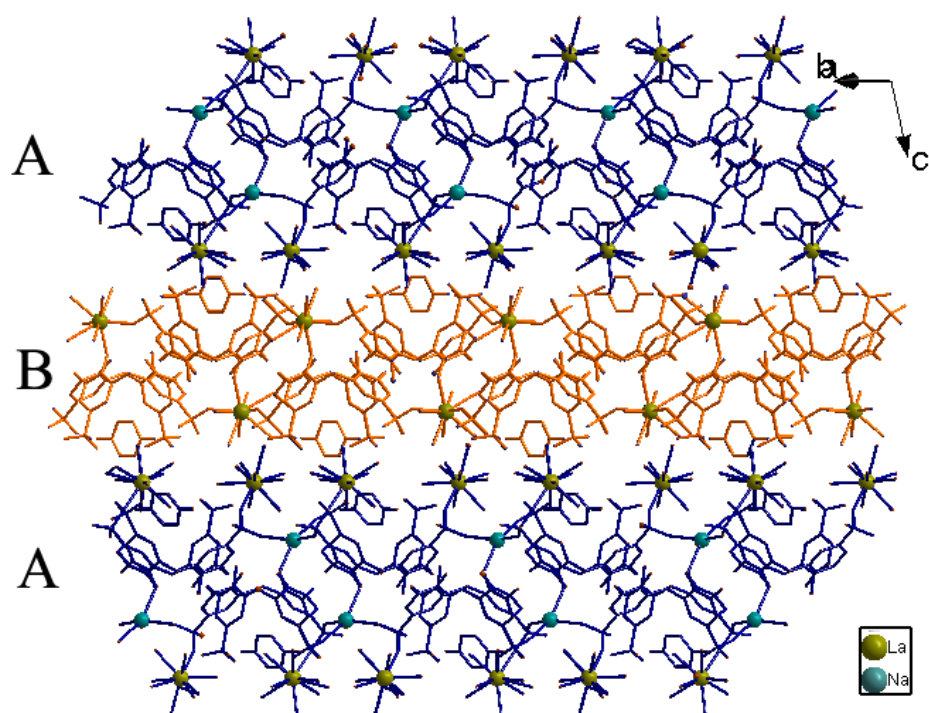

**Fig. S7** Each types of compound 3 showing the bi-layer arrangement.

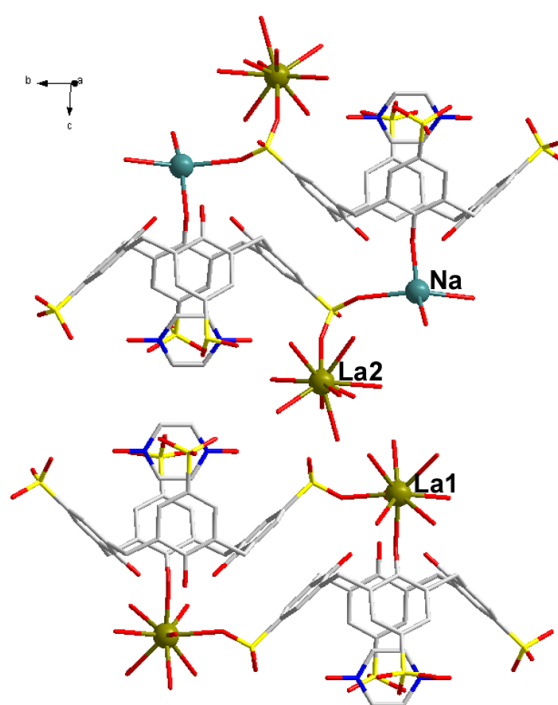

**Fig. S8** The coordination environment of  $\text{La}^{3+}$  ions in type A and type B.
